# Supplementary material for: Complex CatSper-dependent and independent [Ca2+]i signalling in human spermatozoa induced by follicular fluid
Source: PubMed Central journal article supplement (PMC5850303; doi:10.1093/humrep/dex269), 2017-08-28
Supplement: dex269_supplementaryfigures1.pdf [file dex269_supplementaryfigures1.pdf]

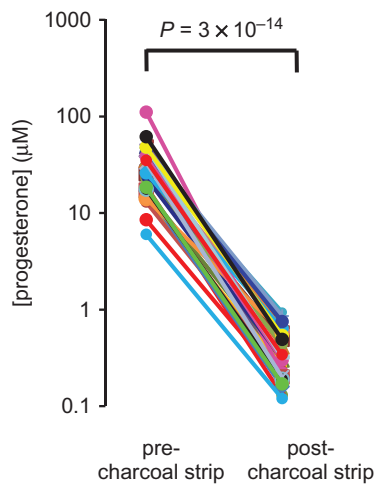

**Supplementary Figure S1** Concentrations of P4 in 31 hFF samples assessed before (left) and after (right) stripping of lipid-derived molecules with dextran-coated charcoal. hFF, human follicular fluid.
