# Supplementary material for: Complex CatSper-dependent and independent [Ca2+]i signalling in human spermatozoa induced by follicular fluid
Source: PubMed Central journal article supplement (PMC5850303; doi:10.1093/humrep/dex269), 2017-08-28
Supplement: dex269_supplementaryfigures2.pdf [file dex269_supplementaryfigures2.pdf]

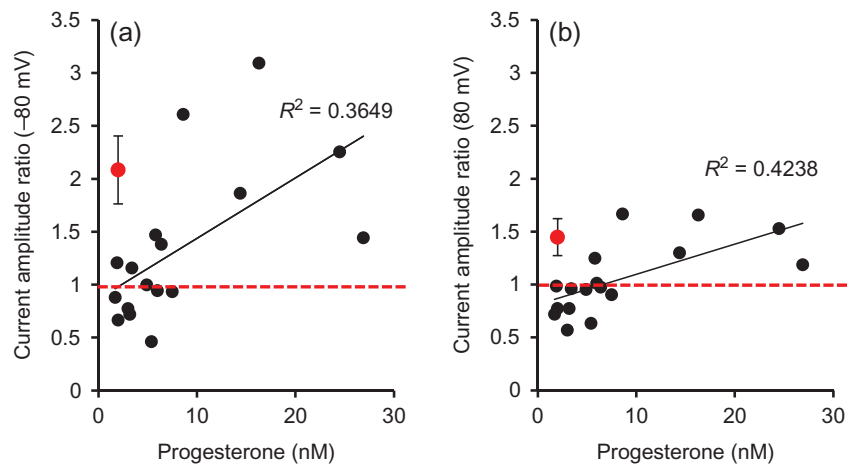

**Supplementary Figure S2** Relationship between concentration of progesterone in ShFF and current amplitude ratio (stimulated amplitude: control amplitude). Inward currents ( $-80$  mV) and outward currents ( $80$  mV) are shown in panels a and b show, respectively. Progesterone concentrations shown (17 different hFF used) are after dilution to 1% as used in the experiment. Black symbols show responses of cells treated with 1% ShFF diluted in  $\text{Cs}^+$  recording saline containing 9 mM EDTA and 9 mM EGTA, red symbols shows mean  $\pm$  SEM for five experiments where ShFF was replaced with standard bath solution (containing 2 mM  $\text{Ca}^{2+}$ , 0.7 mM  $\text{Mg}^{2+}$  and 200 nM progesterone). Fitted linear regressions are shown on each plot.
