# Supplementary material for: Complex CatSper-dependent and independent [Ca2+]i signalling in human spermatozoa induced by follicular fluid
Source: PubMed Central journal article supplement (PMC5850303; doi:10.1093/humrep/dex269), 2017-08-28
Supplement: dex269_supplementaryfigures3.pdf [file dex269_supplementaryfigures3.pdf]

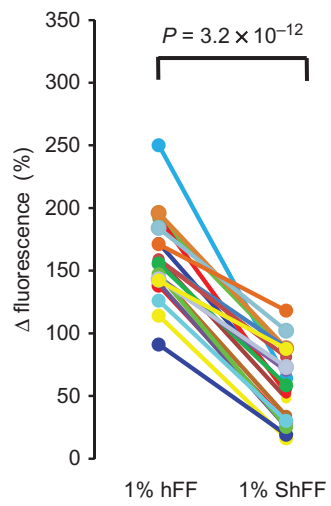

**Supplementary Figure S3** Amplitude of  $[Ca^{2+}]_i$  transient induced by 1% hFF before (left) and after (right) 'stripping' with dextran-coated charcoal. Data from 21 paired recordings using five different hFF samples are shown.  $P = 3.2 \times 10^{-12}$  (paired t-test).
