# Supplementary material for: Complex CatSper-dependent and independent [Ca2+]i signalling in human spermatozoa induced by follicular fluid
Source: PubMed Central journal article supplement (PMC5850303; doi:10.1093/humrep/dex269), 2017-08-28
Supplement: dex269_supplementaryfigures5.pdf [file dex269_supplementaryfigures5.pdf]

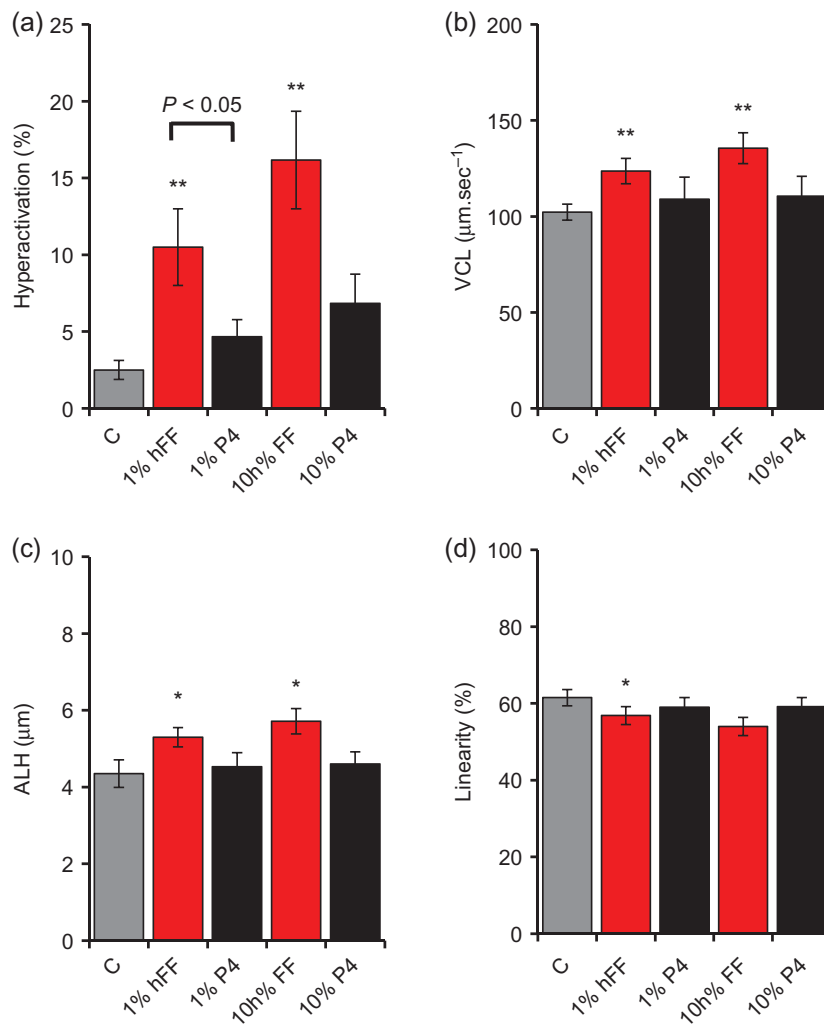

**Supplementary Figure S5** Effects of exposure to hFF or equivalent progesterone concentration on sperm hyperactivation and key kinematic parameters assessed by CASA. Bars show mean  $\pm$  SEM for (a) hyperactivation (%); (b) curvilinear velocity (VCL;  $\mu\text{m}\cdot\text{s}^{-1}$ ), (c) amplitude of lateral head movement (ALH;  $\mu\text{m}$ ), (d) linearity (%). All bars show mean  $\pm$  SEM of six experiments using five different hFF. Grey bars show control, red bars show hFF (1 and 10%), black bars show progesterone (P4) at equivalent dose to 1% hFF (1% P4) or 10% hFF (10% P4). Asterisks indicate significant difference from control (\* $P < 0.05$ ; \*\* $P < 0.01$ ). CASA, Computer-assisted sperm analysis.
